# Supplementary material for: Population structure and antimicrobial susceptibility of Pseudomonas aeruginosa from animal infections in France
Source: PubMed Central journal article supplement (PMC4307146; doi:10.1186/s12917-015-0324-x), 2015-01-21
Supplement: 12917_2015_324_MOESM1_ESM.pdf [file 12917_2015_324_MOESM1_ESM.pdf]

Table S1. Epidemiological data and resistance profiles of all 68 tested isolates

| Strain       | Geographical origin | Sampling date | Animal | Pathology         | Resistance profile <sup>3</sup>    | ST                     |
|--------------|---------------------|---------------|--------|-------------------|------------------------------------|------------------------|
| 25353        | Alpes-Maritimes     | 15.05.2008    | Dog    | Otitis            | GEN                                | 491                    |
| 25355        | Alpes-Maritimes     | 04.06.2008    | Dog    | Otitis            | FOS, CIP                           | 639                    |
| 24220        | Loire-Atlantique    | 03.01.2009    | Dog    | Otitis            | TIC, TTC, CIP                      | 266                    |
| <u>24104</u> | Eure-et-Loire       | 13.01.2009    | Dog    | Otitis            | FEP, GEN, FOS*                     | 1611                   |
| 24254        | Tarn                | 20.01.2009    | Dog    | Metritis          | TTC, GEN, FOS, CIP*                | 1612                   |
| 24969        | Vosges              | 11.03.2009    | Dog    | Otitis            | TIC, GEN, CIP*                     | 1720                   |
| 24257        | Hérault             | 27.04.2009    | Dog    | Otitis            | FEP, GEN, FOS, CIP*                | 255                    |
| 24258        | Hérault             | 17.06.2009    | Dog    | Otitis            | FOS, CIP                           | 1718                   |
| <u>24108</u> | Oise                | 14.07.2009    | Dog    | Otitis            | GEN, FOS                           | <b>560<sup>4</sup></b> |
| 24260        | Hérault             | 27.07.2009    | Dog    | NP <sup>2</sup>   | TTC, CIP                           | 238                    |
| 25363        | Alpes-Maritimes     | 07.10.2009    | Dog    | Otitis            | FOS, CIP                           | 1708                   |
| 25369        | Alpes-Maritimes     | 08.10.2009    | Dog    | Otitis            | FOS, CIP                           | 508                    |
| 25372        | Alpes-Maritimes     | 04.11.2009    | Dog    | Otitis            | AMI, GEN                           | 242                    |
| 25361        | Alpes-Maritimes     | 12.11.2009    | Dog    | Otitis            | TIC, TTC, FOS, CIP*                | 1715                   |
| <u>24692</u> | Gard                | 22.12.2009    | Dog    | Otitis            | GEN                                | <b>253</b>             |
| 24117        | Alpes-Maritimes     | 15.01.2010    | Dog    | Otitis            | TTC, FEP, GEN, CIP*                | 1709                   |
| 24325        | Savoie              | 22.01.2010    | Dog    | Otitis            | TIC, TTC, AZT, AMI, GEN, TOB, CIP* | 1721                   |
| <u>24264</u> | Hérault             | 29.01.2010    | Dog    | Otitis            | CIP                                | 108                    |
| 24972        | Meurthe-et-Moselle  | 01.02.2010    | Dog    | Otitis            | TTC, GEN, FOS*                     | 1613                   |
| 24974        | Moselle             | 01.03.2010    | Dog    | Otitis            | AMI, GEN, TOB, FOS                 | 1228                   |
| 24268        | Alpes-Maritimes     | 09.03.2010    | Dog    | Otitis            | FOS                                | 699                    |
| <u>25055</u> | Gard                | 22.03.2010    | Dog    | Otitis            | GEN, FOS, CIP*                     | 443                    |
| 25262        | Savoie              | 19.04.2010    | Dog    | Skin infection    | TIC, TTC, GEN                      | 1722                   |
| 25324        | Val-de-Marne        | 23.04.2010    | Dog    | Otitis            | GEN                                | 313                    |
| 25320        | Val-de-Marne        | 27.04.2010    | Dog    | Otitis            | AMI, GEN, TOB, FOS, CIP*           | 1717                   |
| 25322        | Val-de-Marne        | 29.04.2010    | Dog    | Otitis            | AMI, GEN, TOB, FOS, CIP*           | 1713                   |
| 25270        | Val-de-Marne        | 03.05.2010    | Dog    | Urinary infection | CIP                                | 1239                   |
| <u>25272</u> | Val-de-Marne        | 04.05.2010    | Dog    | Otitis            | TIC, GEN, CIP*                     | 1614                   |
| <u>25293</u> | Val-de-Marne        | 01.06.2010    | Dog    | Otitis            | GEN, CIP                           | <b>253</b>             |
| 25331        | Val-de-Marne        | 10.06.2010    | Dog    | Otitis            | CIP                                | <b>395</b>             |

|              |                    |            |        |                       |                          |            |
|--------------|--------------------|------------|--------|-----------------------|--------------------------|------------|
| 25303        | Val-de-Marne       | 15.06.2010 | Dog    | NP                    | TTC, FEP, GEN            | 1716       |
| 25292        | Val-de-Marne       | 24.06.2010 | Dog    | Otitis                | TTC, AMI, GEN, FOS*      | 1480       |
| 25163        | Alpes-Maritimes    | 29.06.2010 | Dog    | Skin infection        | CIP                      | <b>155</b> |
| 25187        | Nièvre             | 10.07.2010 | Dog    | Otitis                | GEN                      | 279        |
| <u>25305</u> | Val-de-Marne       | 23.07.2010 | Dog    | NP                    | TIC, TTC, FOS, CIP*      | 443        |
| <u>25827</u> | Val-de-Marne       | 28.07.2010 | Dog    | Skin infection        | TIC, TTC, GEN, FOS, CIP* | <b>395</b> |
| 25189        | Val-de-Marne       | 17.08.2010 | Dog    | Otitis                | TIC, TTC, CIP            | 132        |
| 25319        | Cantal             | 25.08.2010 | Dog    | Otitis                | TTC, GEN                 | 1712       |
| <u>25810</u> | Val-de-Marne       | 09.09.2010 | Dog    | Otitis                | CIP                      | 108        |
| 25812        | Val-de-Marne       | 09.09.2010 | Dog    | Otitis                | GEN, FOS, CIP*           | 697        |
| 25799        | Val-de-Marne       | 16.09.2010 | Dog    | Otitis                | CIP                      | 639        |
| 25746        | Val-de-Marne       | 28.09.2010 | Dog    | Bone infection        | TIC, TTC, AZT, FOS       | 412        |
| 25751        | Val-de-Marne       | 08.10.2010 | Dog    | Otitis                | AMI, GEN, TOB            | 1719       |
| <u>25752</u> | Val-de-Marne       | 09.10.2010 | Dog    | Skin infection        | CIP                      | <b>560</b> |
| 25745        | Val-de-Marne       | 25.10.2010 | Dog    | NP                    | TIC, TTC, AZT, FOS       | <b>560</b> |
| 26008        | Haut-Rhin          | 24.11.2010 | Dog    | Otitis                | FOS, CIP                 | <b>395</b> |
| 24362        | Moselle            | 02.10.2009 | Bovine | Respiratory infection | GEN, FOS                 | 683        |
| 24970        | Doubs              | 21.01.2010 | Bovine | Digestive infection   | FOS                      | 453        |
| 25119        | Maine-et-Loire     | 22.04.2010 | Bovine | Mastitis              | TIC, FOS                 | 244        |
| 26858        | Manche             | 08.06.2010 | Bovine | Mastitis              | TIC                      | 483        |
| 26006        | Meurthe-et-Moselle | 01.07.2010 | Bovine | Mastitis              | FOS                      | 838        |
| 26849        | Lozère             | 09.07.2010 | Bovine | Mastitis              | FOS                      | 108        |
| 25574        | Yonne              | 13.07.2010 | Bovine | Mastitis              | FOS                      | 683        |
| 25919        | Jura               | 21.09.2010 | Bovine | Mastitis              | none                     | 303        |
| 26317        | Isère              | 24.11.2010 | Bovine | Mastitis              | FOS                      | 664        |
| 26119        | Savoie             | 21.12.2010 | Bovine | Respiratory infection | none                     | 1711       |
| 26374        | Cantal             | 06.01.2011 | Bovine | Respiratory infection | FOS                      | 1710       |
| 26319        | Nièvre             | 07.01.2011 | Bovine | Respiratory infection | TIC, TTC, FOS            | 646        |
| 24466        | Hérault            | 05.11.2009 | Horse  | Skin infection        | FOS                      | 1225       |
| <u>25685</u> | Hautes-Alpes       | 17.05.2010 | Horse  | Eye infection         | none                     | 1614       |
| 26861        | Manche             | 16.07.2010 | Horse  | Metritis              | FOS                      | <b>27</b>  |
| 26007        | Meurthe-et-Moselle | 01.08.2010 | Horse  | Skin infection        | FOS                      | 564        |
| <u>26854</u> | Bas-Rhin           | 01.02.2011 | Horse  | NP                    | none                     | 1614       |
| 26185        | Haute-Savoie       | 11.02.2011 | Horse  | NP                    | GEN, TOB                 | 108        |

|              |              |            |       |                       |      |            |
|--------------|--------------|------------|-------|-----------------------|------|------------|
| 26973        | Mayenne      | 28.03.2011 | Horse | Respiratory infection | FOS  | 1714       |
| 26863        | Manche       | 06.07.2011 | Horse | Metritis              | FOS  | 252        |
| 27641        | Val-de-Marne | 30.08.2011 | Horse | Respiratory infection | none | <b>155</b> |
| <u>27627</u> | Haute-Savoie | 07.09.2011 | Horse | Skin infection        | FOS  | 1611       |

<sup>1</sup> underlined: strains with the same pulsotype (25272/25685/26854; 24104/27627; 24692/25293; 24264/25810; 25055/25305; 24108/25752; 25827/26008)

<sup>2</sup> NP, not provided

<sup>3</sup> TIC, ticarcillin; TTC, ticarcillin – clavulanic acid; FEP, cefepim; ATM, aztreonam; AMI, amikacin; GEN, gentamicin; TOB, tobramycin; FOS, fosfomycin; CIP, ciprofloxacin

<sup>4</sup> in bold: STs associated to human outbreaks and sometimes to multidrug resistant phenotypes.

\* Isolates presenting a multidrug resistant phenotype (resistance to 3 or 4 antibiotic families)
