# Supplementary material for: Population structure and antimicrobial susceptibility of Pseudomonas aeruginosa from animal infections in France
Source: PubMed Central journal article supplement (PMC4307146; doi:10.1186/s12917-015-0324-x), 2015-01-21

**Figure S1.** PFGE profile of all *P. aeruginosa* isolates.

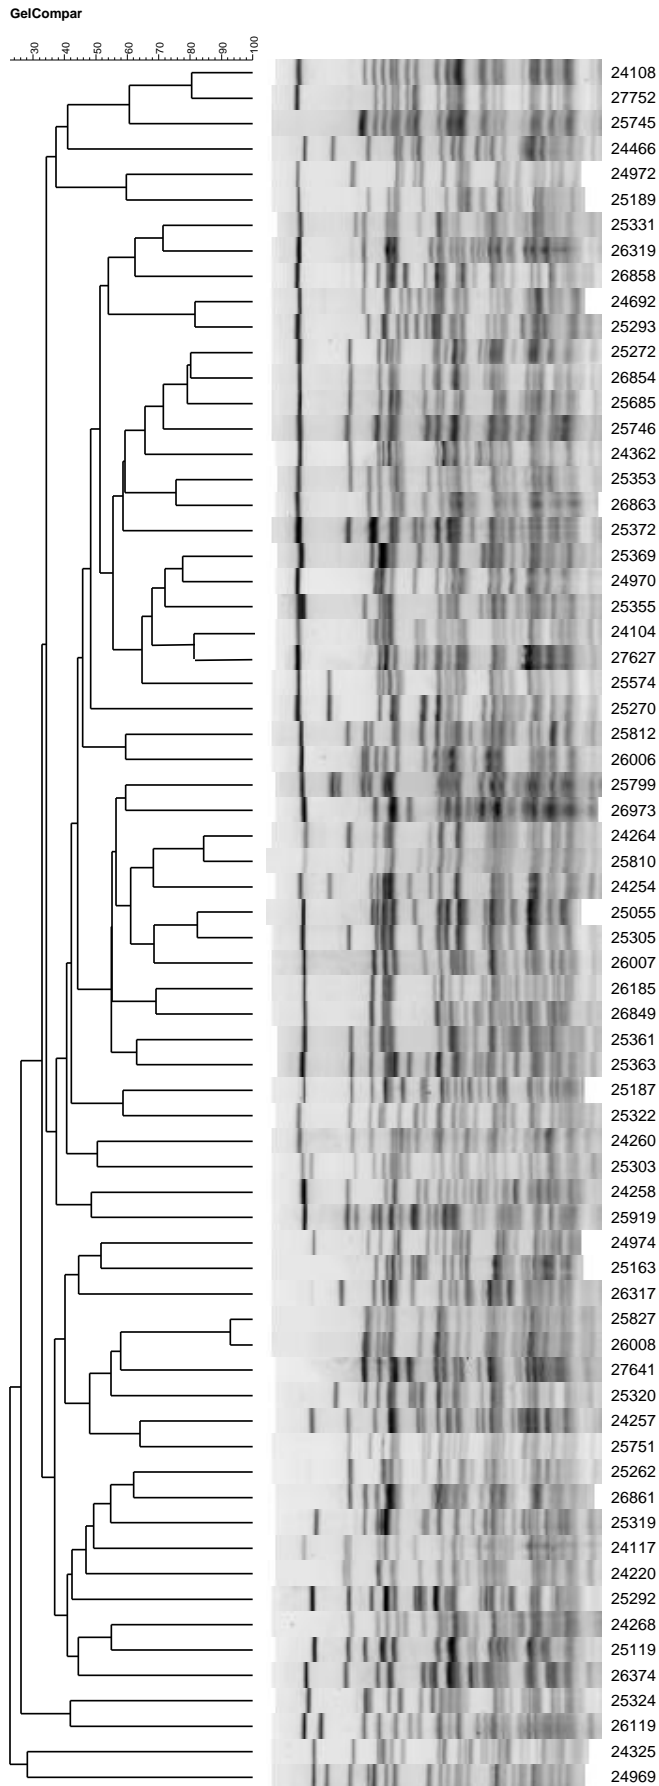

Supplement: 12917_2015_324_MOESM2_ESM.pdf [file 12917_2015_324_MOESM2_ESM.pdf]
